# Supplementary material for: Layered double hydroxide supported gold nanoclusters by glutathione-capped Au nanoclusters precursor method for highly efficient aerobic oxidation of alcohols
Source: Royal Society of Chemistry journal article supplement (doi:10.1039/c3nr05604j), 2014-01-01
Supplement: c3nr05604j.pdf [file c3nr05604j.pdf]

## Electronic Supplementary Information

### **Layered double hydroxide supported gold nanoclusters by glutathione-capped Au nanoclusters precursor method for highly efficient aerobic oxidation of alcohols**

**Lun Li, Liguang Dou and Hui Zhang\***

*State Key Laboratory of Chemical Resource Engineering, Beijing University of Chemical Technology, Beijing 100029, P. R. China.*

\* E-mail: [huizhang67@gst21.com](mailto:huizhang67@gst21.com);

Fax: +8610-6442 5385;

Tel: +8610-6442 5872

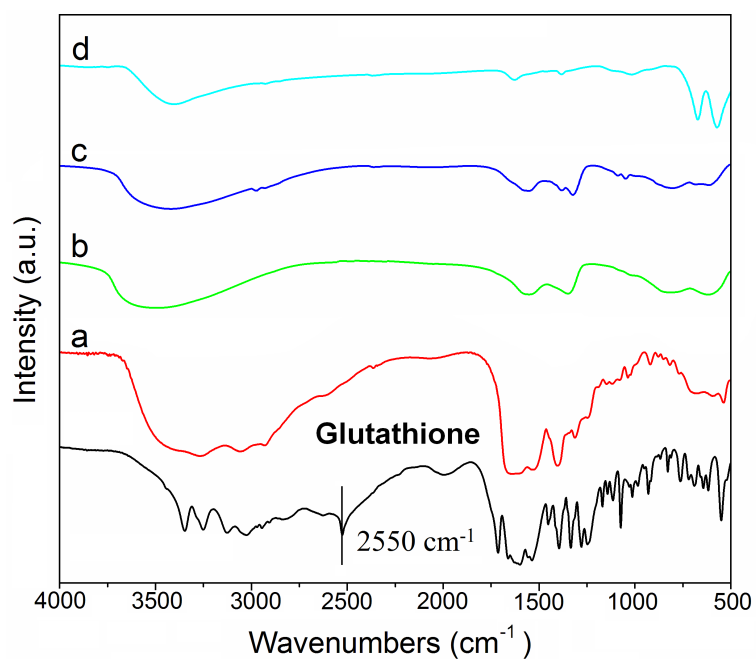

**Fig. S1** FTIR spectra of glutathione, GS-AuNCs (a), AuNCs/Mg<sub>3</sub>Al-LDH-0.23 (b), AuNCs/Ni<sub>3</sub>Al-LDH-0.22 (c), AuNCs/Co<sub>3</sub>Al-LDH-0.20 (d).

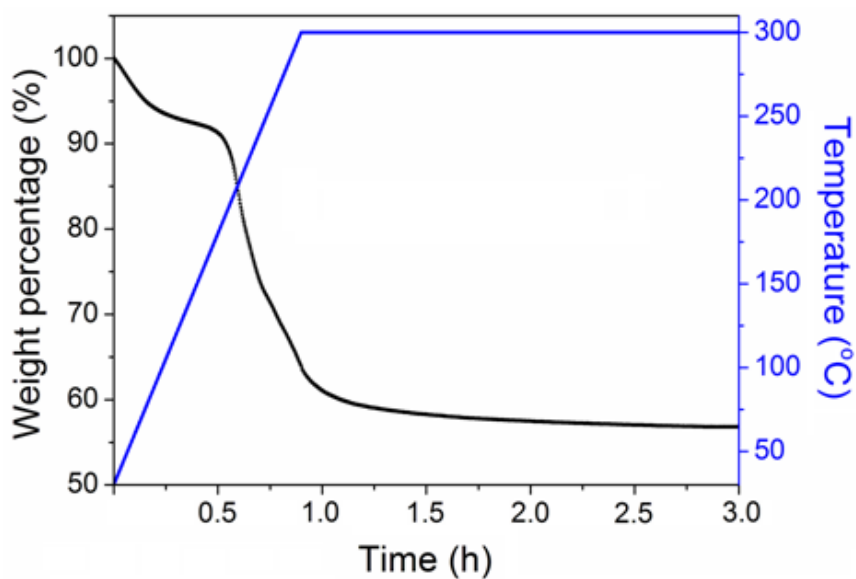

**Fig. S2** TG analysis of GS-AuNCs.

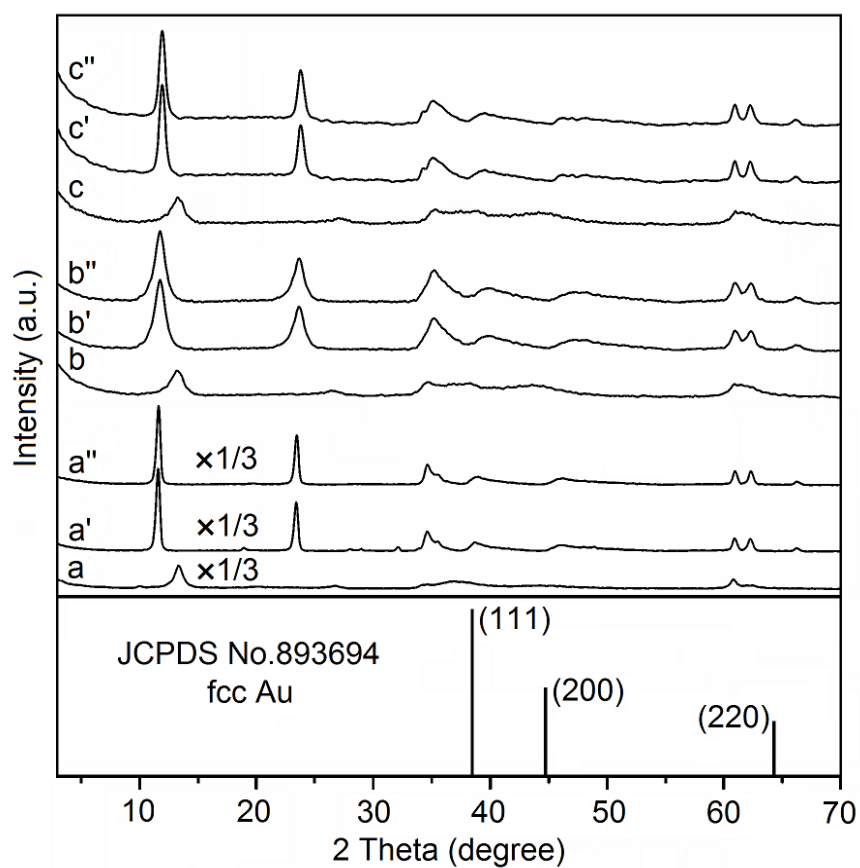

**Fig. S3** XRD patterns of AuNCs/Mg<sub>3</sub>Al-LDH-0.59 (a), GS-AuNCs/Mg<sub>3</sub>Al-LDH-10 (a') Mg<sub>3</sub>Al-LDH (a''), AuNCs/Ni<sub>3</sub>Al-LDH-0.22 (b) GS-AuNCs/Ni<sub>3</sub>Al-LDH-4 (b'), Ni<sub>3</sub>Al-LDH (b''), AuNCs/Co<sub>3</sub>Al-LDH-0.20 (c), GS-AuNCs/Co<sub>3</sub>Al-LDH-4 (c'), Co<sub>3</sub>Al-LDH (c'').

**Table S1** XRD parameters of the LDH supported Au nanoclusters catalysts.

| Samples                            | $d_{003}/\text{nm}$ | $d_{110}/\text{nm}$ | $c/\text{nm}^a$ | $a/\text{nm}^a$ | $M^{2+}/Al^{3+}{}^b$ |
|------------------------------------|---------------------|---------------------|-----------------|-----------------|----------------------|
| Mg <sub>3</sub> Al-LDH             | 0.762               | 0.1523              | 2.286           | 0.3046          | 2.98                 |
| GS-AuNCs/Mg <sub>3</sub> Al-LDH-10 | 0.762               | 0.1523              | 2.286           | 0.3046          |                      |
| AuNCs/Mg <sub>3</sub> Al-LDH-0.59  | 0.663               | 0.1525              | 1.989           | 0.3050          |                      |
| Ni <sub>3</sub> Al-LDH             | 0.758               | 0.1509              | 2.274           | 0.3018          | 2.95                 |
| GS-AuNCs/Ni <sub>3</sub> Al-LDH-4  | 0.756               | 0.1509              | 2.268           | 0.3018          |                      |
| AuNCs/Ni <sub>3</sub> Al-LDH-0.22  | 0.668               | 0.1506              | 2.004           | 0.3012          |                      |
| Co <sub>3</sub> Al-LDH             | 0.769               | 0.1538              | 2.307           | 0.3076          | 2.96                 |
| GS-AuNCs/Co <sub>3</sub> Al-LDH-4  | 0.770               | 0.1538              | 2.310           | 0.3076          |                      |
| AuNCs/Co <sub>3</sub> Al-LDH-0.20  | 0.668               | 0.1536              | 2.004           | 0.3072          |                      |

<sup>a</sup> Based on hexagonal crystal system,  $a = 2d_{110}$ ,  $c = 3d_{003}$ .

<sup>b</sup> Based on ICP data.

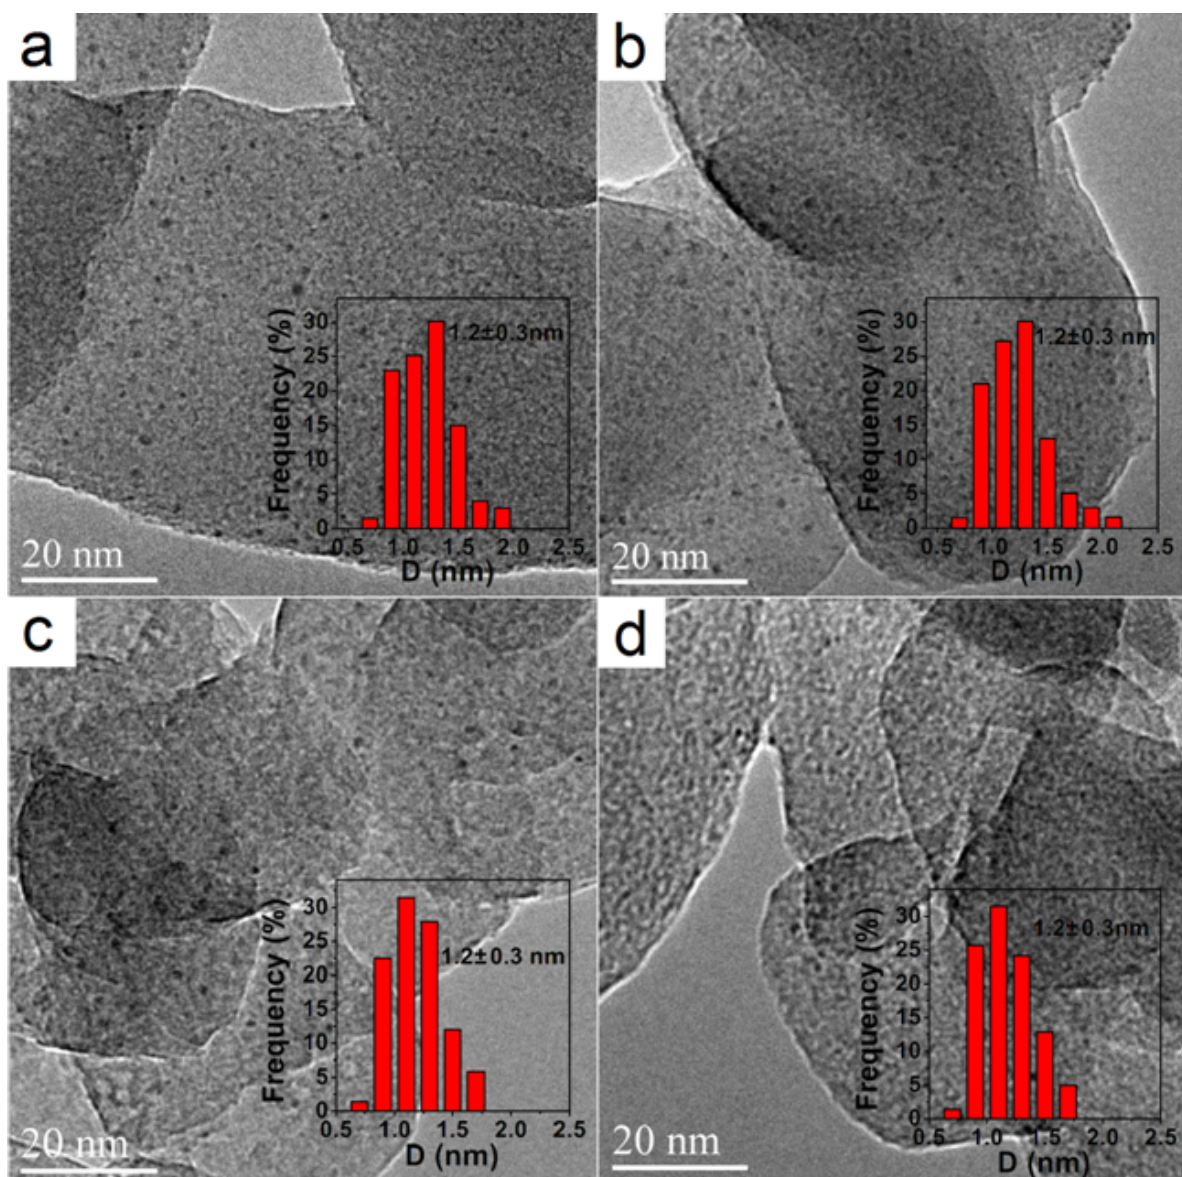

**Fig. S4** HRTEM images of the precursors GS-Au/Mg<sub>3</sub>Al-LDH-16 (a), GS-Au/Mg<sub>3</sub>Al-LDH-10 (b), GS-Au/Mg<sub>3</sub>Al-LDH-4 (c), and GS-Au/Mg<sub>3</sub>Al-LDH-2 (d).

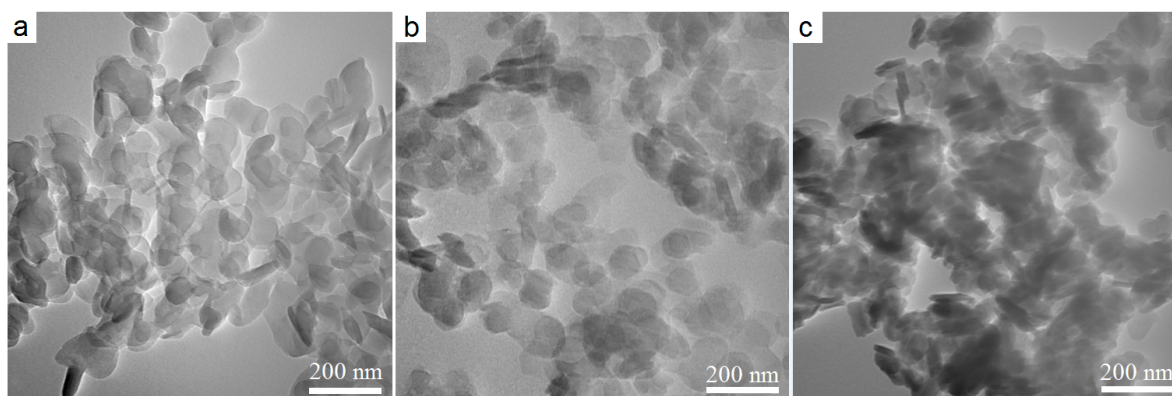

**Fig. S5** TEM images of the supports Mg<sub>3</sub>Al-LDH (a), Ni<sub>3</sub>Al-LDH (b) and Co<sub>3</sub>Al-LDH (c).

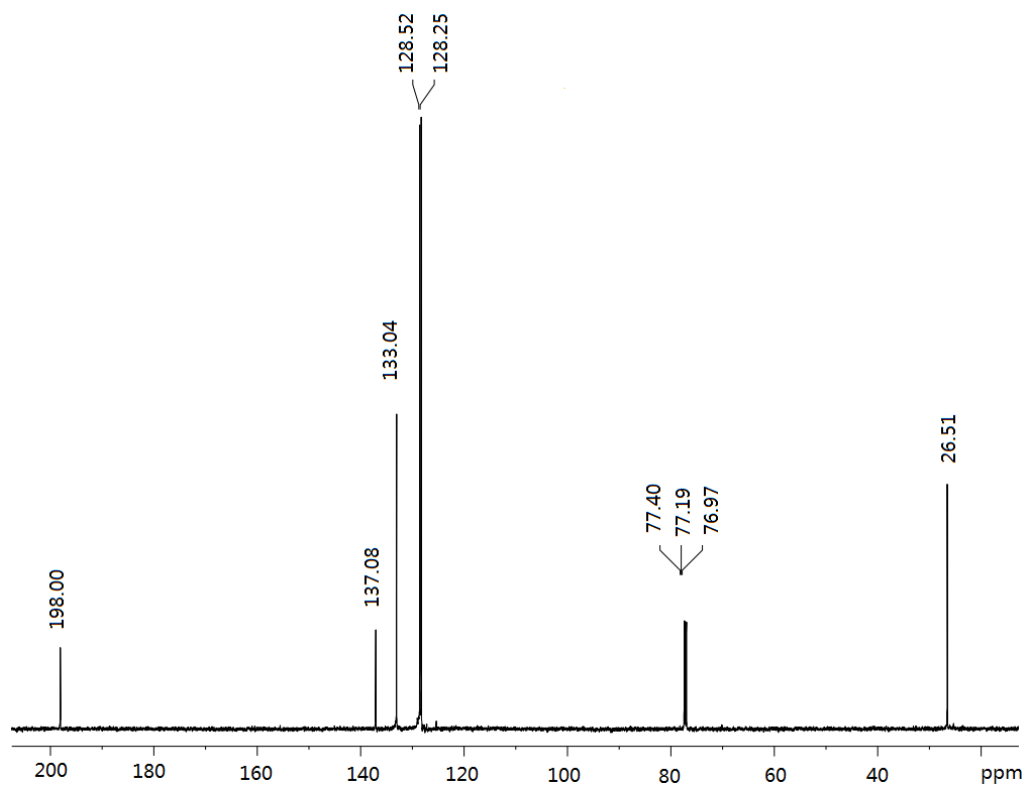

**Fig. S6** <sup>13</sup>C NMR spectrum of the oxidation product of 1-phenylethanol (reaction conditions: 1-phenylethanol (100 mmol), catalyst (AuNCs/Mg<sub>3</sub>Al-LDH-0.23, Au: 4.0 × 10<sup>-4</sup> mol%), O<sub>2</sub> (20 mL/min), 160 °C, 24 h)



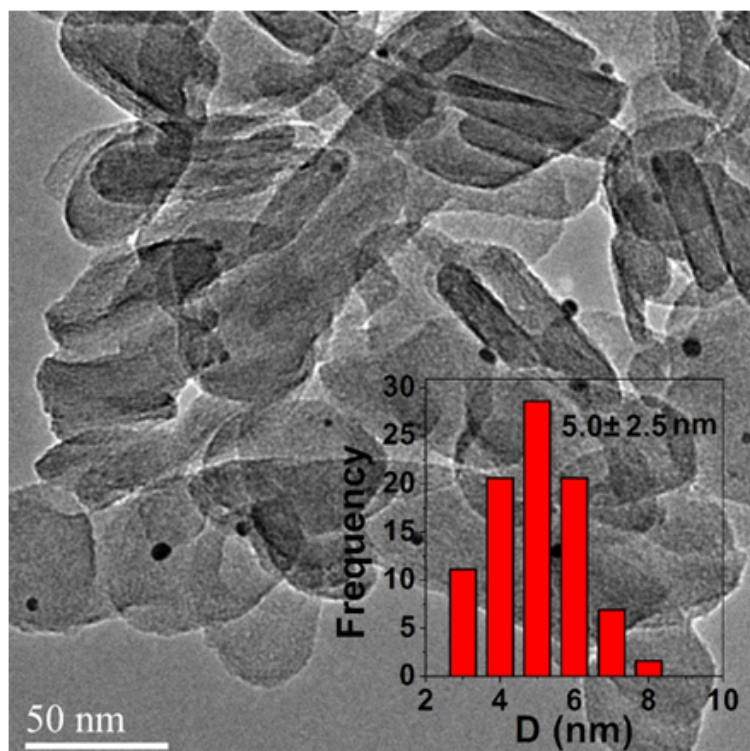

**Fig. S7** TEM image of Au/Mg<sub>3</sub>Al-LDH(DP).

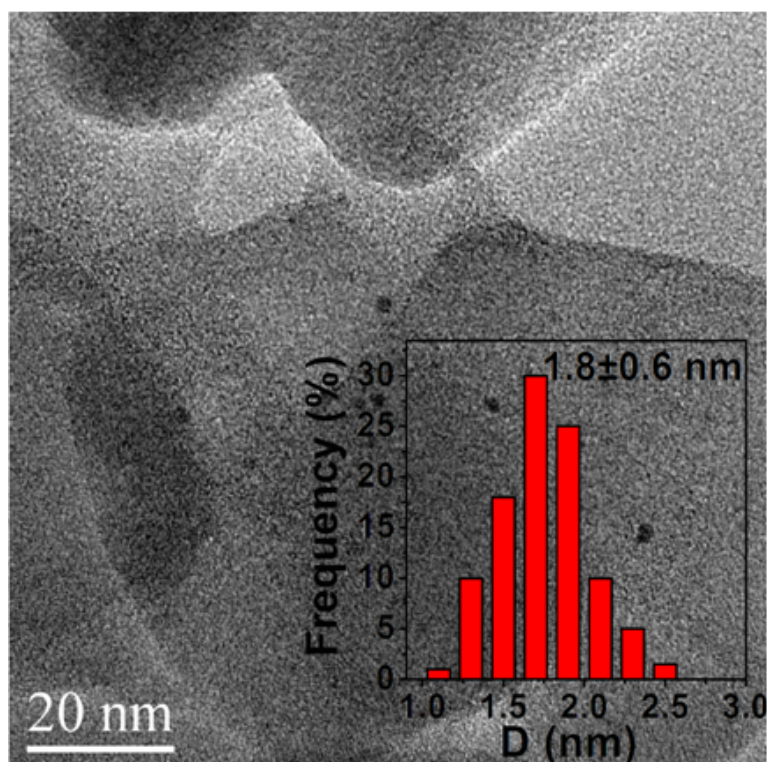

**Fig. S8** TEM image of AuNCs/Mg<sub>3</sub>Al-LDH-0.23 recovered from the fifth run.

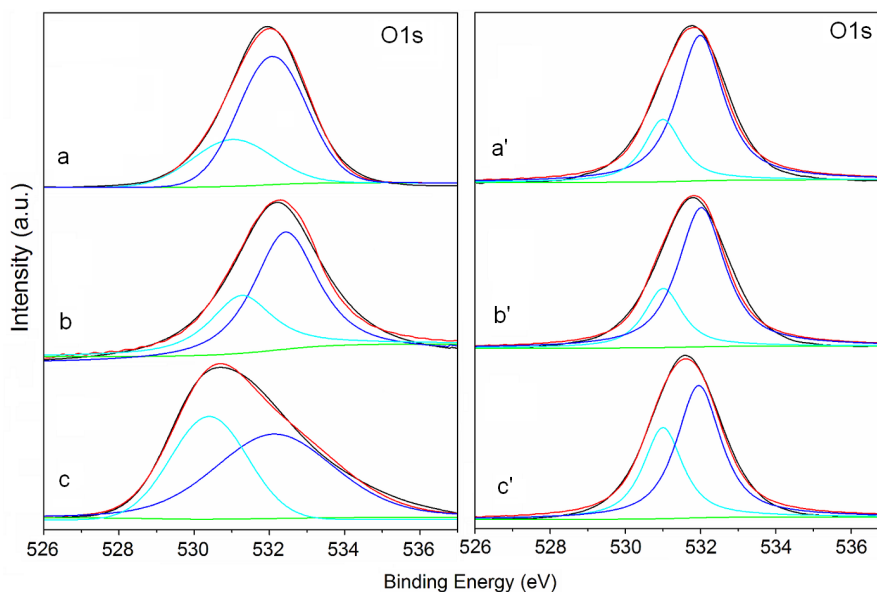

**Fig. S9** O1s XPS spectra of AuNCs/Mg<sub>3</sub>Al-LDH-0.59 (a), Mg<sub>3</sub>Al-LDH-10 (a') Mg<sub>3</sub>Al-LDH, AuNCs/Ni<sub>3</sub>Al-LDH-0.22 (b) Ni<sub>3</sub>Al-LDH (b'), AuNCs/Co<sub>3</sub>Al-LDH-0.20 (c), Co<sub>3</sub>Al-LDH (c').

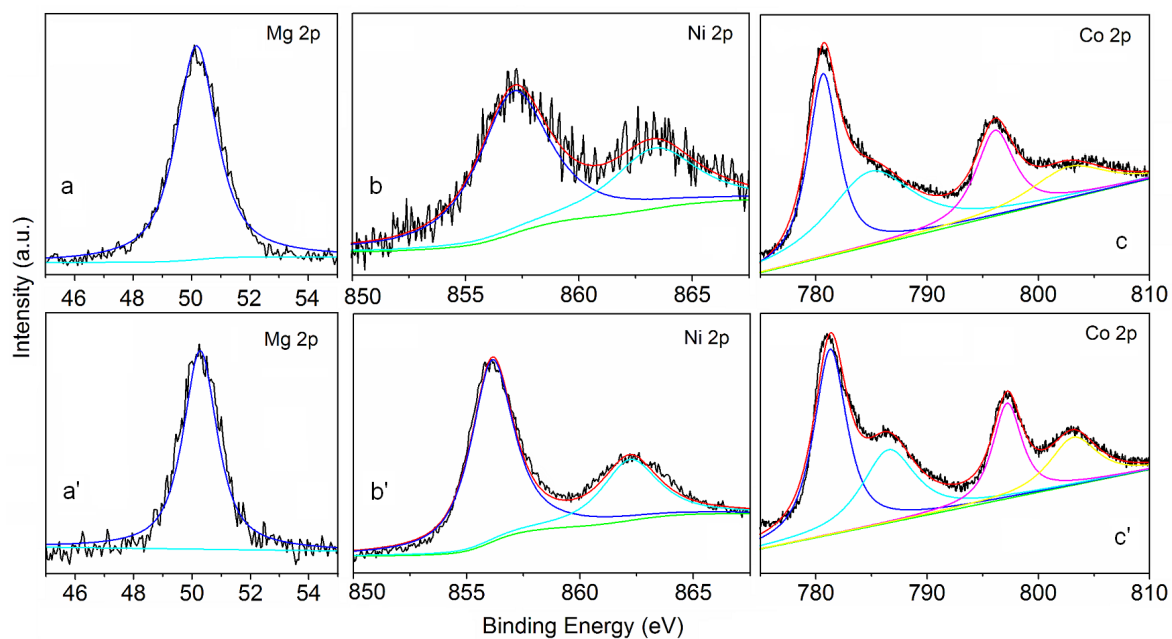

**Fig. S10** Mg, Ni, Co 2p XPS spectra of AuNCs/Mg<sub>3</sub>Al-LDH-0.59 (a), Mg<sub>3</sub>Al-LDH-10 (a') Mg<sub>3</sub>Al-LDH, AuNCs/Ni<sub>3</sub>Al-LDH-0.22 (b) Ni<sub>3</sub>Al-LDH (b'), AuNCs/Co<sub>3</sub>Al-LDH-0.20 (c), Co<sub>3</sub>Al-LDH (c').



**Table S2** XPS analysis and isoelectronic point determination data of the catalysts compared with the supports

| Sample                            | M 2p <sub>3/2</sub> (M = Mg, Ni, Co) (eV) | O1s (eV) (-OH) | O1s (eV) (O <sup>2-</sup> ) | pI <sup>a</sup> |
|-----------------------------------|-------------------------------------------|----------------|-----------------------------|-----------------|
| AuNCs/Mg <sub>3</sub> Al-LDH-0.23 | 50.2                                      | 532.0 (70%)    | 531.0 (30%)                 | 10.3            |
| Mg <sub>3</sub> Al-LDH            | 50.2                                      | 532.0 (74%)    | 531.0 (26%)                 | 11.0            |
| AuNCs/Ni <sub>3</sub> Al-LDH-0.22 | 856.9                                     | 532.4 (68%)    | 531.2 (32%)                 | 10.0            |
| Ni <sub>3</sub> Al-LDH            | 855.9                                     | 532.0 (73%)    | 531.0 (27%)                 | 10.4            |
| AuNCs/Co <sub>3</sub> Al-LDH-0.20 | 780.2                                     | 532.0 (53%)    | 530.4 (47%)                 | 9.5             |
| Co <sub>3</sub> Al-LDH            | 780.8                                     | 532.0 (65%)    | 531.0 (35%)                 | 10.2            |

<sup>a</sup> Upon the zeta potential determination on a Malvern Zetasizer Nano ZS instrument equipped with a multipurpose autotitrator (MPT-2). The sample suspension was prepared by dispersing of 1 mg nanoparticles in 1 ml of ultrapure water and subsequently the suspension was ultrasonically agitated for 10 min. The zeta potential depended on pH, as titration solutions 0.25 M HCl and 0.25 M NaOH were used.
